# Supplementary material for: Pharmacological Akt and JNK Kinase Inhibitors 10-DEBC and SP600125 Potentiate Anti-Glioblastoma Effect of Menadione and Ascorbic Acid Combination in Human U251 Glioblastoma Cells
Source: MDPI journal article supplement (doi:10.3390/biomedicines11102652), 2023-09-27
Supplement: s1 [file s1]

# Pharmacological Akt and JNK kinase inhibitors 10-DEBC and SP600125 potentiate anti-glioblastoma effect of menadione and ascorbic acid combination in human U251 glioblastoma cells

Ana Despotović, Kristina Janjetović, Nevena Zogović and Gordana Tovilović-Kovačević

## Supplementary material

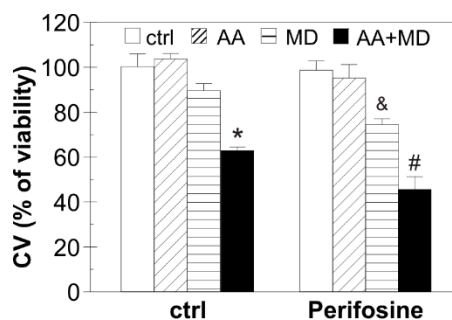

**Figure S1**

**Figure S1. Akt inhibitor perifosine potentiates AA+MD-triggered U251 cell death and induces MD cytotoxicity.** Untransfected U251 cells were pre-treated with perifosine (10  $\mu$ M) and then exposed to AA (1 mM), MD (20  $\mu$ M), and their combination (AA+MD) for 16h. Cell viability was assessed by crystal violet assay. The data are presented as mean  $\pm$  SD values of triplicates from one representative of three independent experiments. \* $p$ <0.05 compared to control, untreated cells (ctrl), # $p$ <0.05 compared to cells treated with AA+MD, & $p$ <0.05 compared to cells treated with MD.

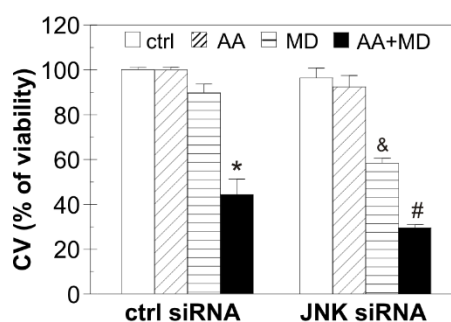

**Figure S2**

**Figure S2. JNK downregulation with siRNA potentiates AA+MD-triggered U251 cell death and induces MD cytotoxicity.** U251 cells transfected with control or JNK siRNA were treated with AA (1 mM), MD (20  $\mu$ M), and their combination (AA+MD) for 16h. Cell viability was assessed by crystal violet assay. The data are presented as mean  $\pm$  SD values of triplicates from one representative of three independent experiments. \* $p$ <0.05 compared to control, untreated cells (ctrl), # $p$ <0.05 compared to control cells treated with AA+MD, & $p$ <0.05 compared to control cells treated with MD.

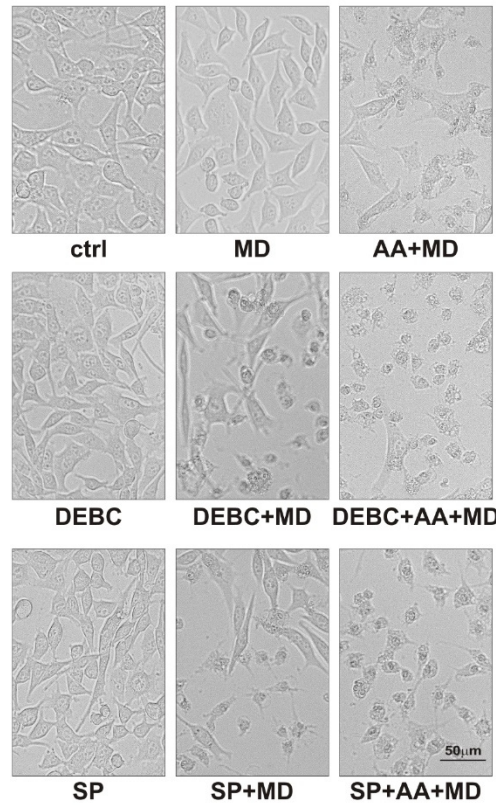

**Figure S3**

**Figure S3. Morphological changes of U251 cells treated with 10-DEBC, SP, MD, and the combination.** U251 cells were pre-treated with 10-DEBC (10  $\mu$ M) and SP (10  $\mu$ M) for 30 min and then treated with MD (20  $\mu$ M) and AA+MD (1 mM+20  $\mu$ M). The changes in morphology were observed after 6 hours of treatment using Bio-rad ZOE Cell Imager.

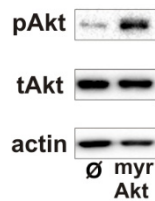

**Figure S4**

**Figure S4. Myristoylated Akt transfection efficiency.** U251 cells were transfected with PCDNA control construct (1 ng/ $\mu$ l) and Myr-Akt (1 ng/ $\mu$ l). Cells were allowed to grow 24h following transfection and immunoblot analysis of phospho-Akt (pAkt), total-Akt (tAkt), and actin was performed to confirm transfection efficiency. Representative immunoblots are shown.
